# Supplementary material for: PAICS/DYRK3 Multienzyme Interactions as Coregulators of Purinosome Formation and Metabolism on Radioresistance in Oral Squamous Cell Carcinoma
Source: MDPI journal article supplement (doi:10.3390/ijms242417346), 2023-12-11
Supplement: s1 [file s1]

## SUPPLEMENTARY INFORMATION

### **PAICS/DYRK3 Multienzyme Interactions as Coregulators of Purinosome Formation and Metabolism on Radioresistance in Oral Squamous Cell Carcinoma**

**Chin-Sheng Huang 1,2,†, Ming-Shou Hsieh 1,2,†, Vijesh Kumar Yadav 1,2,  
Yang-Che Wu 1,2,3, Shao-Cheng Liu 4, Chi-Tai Yeh 5,6,\* and  
Mao-Suan Huang 1,2,\***

1 Department of Dentistry, Taipei Medical University-Shuang Ho Hospital, New Taipei City 235, Taiwan

2 School of Dentistry, College of Oral Medicine, Taipei Medical University, Taipei City 110, Taiwan

3 Department of Dentistry and Oral Health, Taipei Medical University-Shuang Ho Hospital, New Taipei City 235, Taiwan

4 Department of Otolaryngology-Head and Neck Surgery, Tri-Service General Hospital, National Defense Medical Center, Taipei City 114, Taiwan

5 Department of Medical Research & Education, Taipei Medical University-Shuang Ho Hospital, New Taipei City 235, Taiwan

6 Continuing Education Program of Food Biotechnology Applications, College of Science and Engineering, National Taitung University, Taitung 950, Taiwan

\* Correspondence: [ctyeh@s.tmu.edu.tw](mailto:ctyeh@s.tmu.edu.tw) (C.-T.Y.); [hms4837@tmu.edu.tw](mailto:hms4837@tmu.edu.tw) (M.-S.H.); Tel.: +886-2-2490088 (ext. 8881) (C.-T.Y. & M.-S.H.); Fax: +886-2-2248-0900 (C.-T.Y. & M.-S.H.)

† These authors contributed equally to this work

**Supplementary Table S1. Q-PCR primer list.**

| Primer         | forward                | reverse                 |
|----------------|------------------------|-------------------------|
| DYRK3          | CTGCAATCCTTCTGAACCACTC | CTACCTTCATCTCACCTCCATCC |
| PAICS          | ACCACCTGGAAGGAAAAGCTGC | CGGTGCAATGAAAGCTGTCTCC  |
| PPAT           | GCGATTGAAGCACCTGTGGATG | CGGTTTTTACACAGCACCTCCAC |
| GIT2           | GAGTTTGCCACGCTGGTCATTG | GACTCTCAACGCTGTGCTGGTT  |
| ATM            | TGTTCCAGGACACGAAGGGAGA | CAGGGTTCTCAGCACTATGGGA  |
| $\beta$ -Actin | CACCATGGCAATGAGCGGTTTC | AGGTCTTTGCGGATGTCCACGT  |

**Supplementary Table S2. Antibody list.**

| Antibody           | catalog number | source        |
|--------------------|----------------|---------------|
| DYRK3 mAb          | ab96617        | Abcam         |
| PAICS mAb          | ab151472       | Abcam         |
| PPAT mAb           | ab248259       | Abcam         |
| Glut-1 mAb         | ab115730       | Abcam         |
| $\beta$ -Actin mAb | #4967          | Cellsignaling |

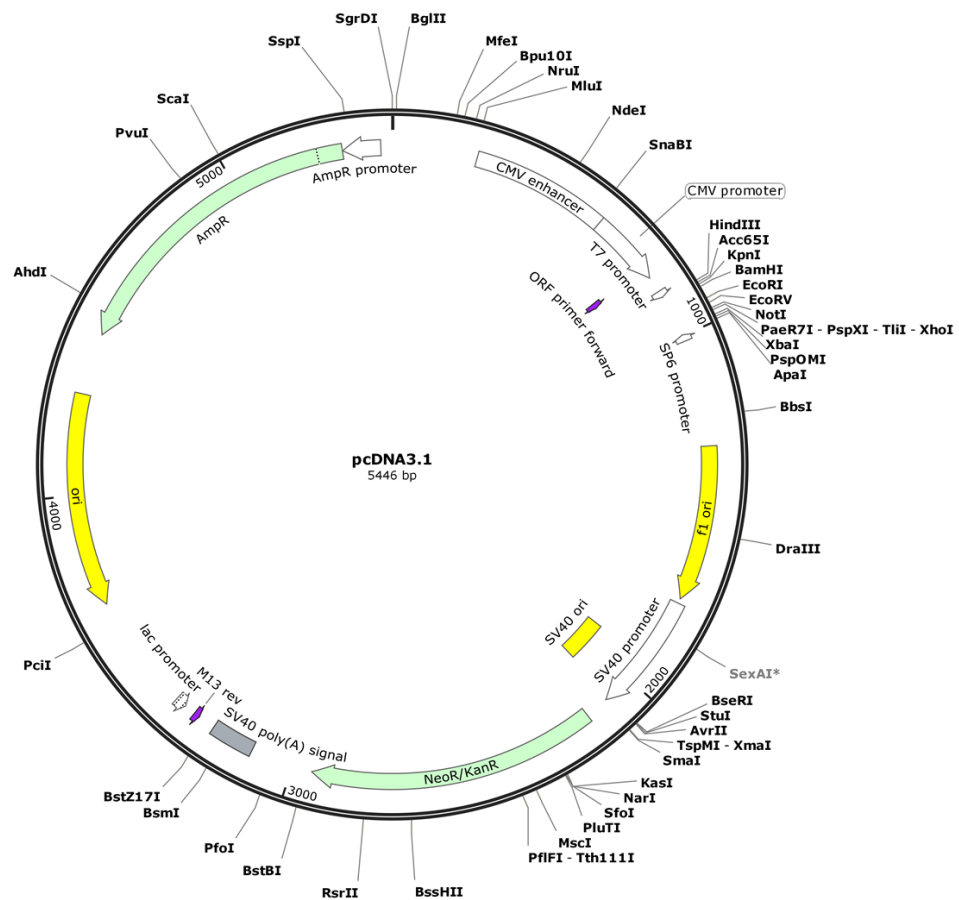

| Primer              | Sequence                          |
|---------------------|-----------------------------------|
| DYRK3-ECOR1-forward | AATTGAATTCCTGCAATCCTTCTGAACCACCTC |
| DYRK3-Xba1-reversed | AATTCTAGACTACCTTCATCTCACCTCCATCC  |

**Supplementary Figure S1:** Overexpression of DYRK3 plasmid backbone and primer design.

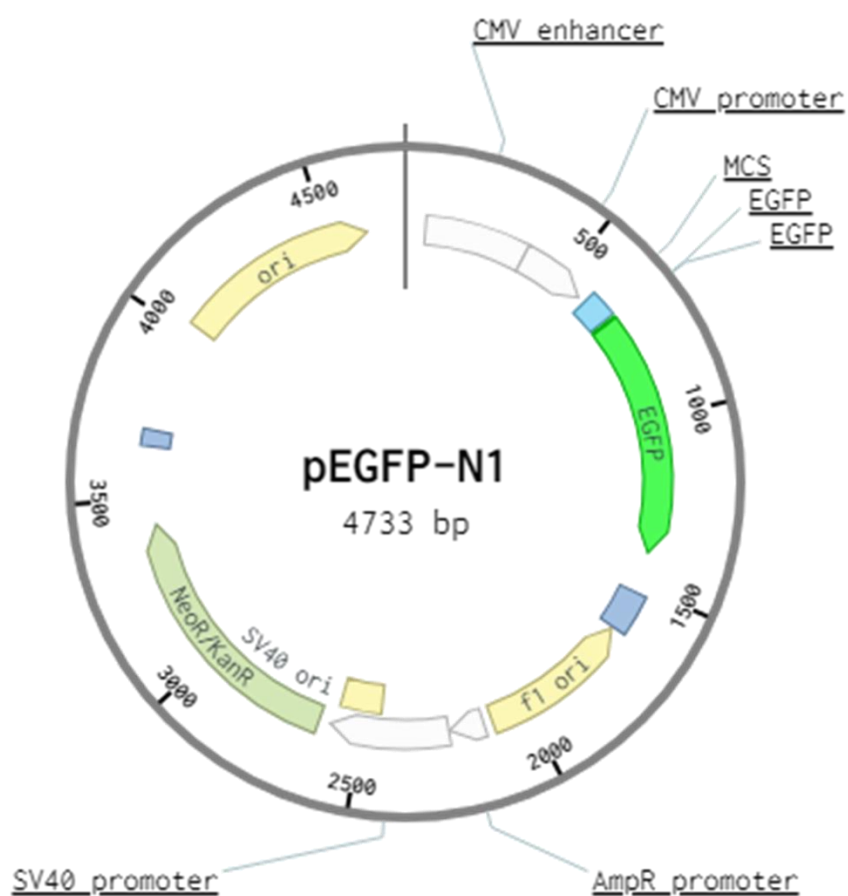

| Primer               | Sequence                           |
|----------------------|------------------------------------|
| PAICS-ECOR1-forward  | AATTGAATTCACCACTGGAAGGAAAAGCTGC    |
| PAICS-BamH1-reversed | AATTGGATCCCGGTGCAATGAAAGCTGTCTCC   |
| PPAT-ECOR1-forward   | AATT GAATTCGCGATTGAAGCACCTGTGGATG  |
| PPAT-BamH1-reversed  | AATT GGATCCCGGTTTTTACACAGCACCTCCAC |

**Supplementary Figure S2:** The fluorescent protein fusion vector PAICS-EGFP-N1 and PPAT-EGFP-N1.
